# Supplementary material for: Jasmonic acid and glucose synergistically modulate the accumulation of glucosinolates in Arabidopsis thaliana
Source: PubMed Central journal article supplement (PMC3871825; doi:10.1093/jxb/ert348), 2013-10-22

# Jasmonic acid and glucose synergistically modulate the accumulation of glucosinolates in *Arabidopsis thaliana*

Rongfang Guo<sup>1</sup>, Wangshu Shen<sup>1</sup>, Hongmei Qian<sup>1</sup>, Min Zhang<sup>1</sup>, Lihong Liu<sup>1</sup>, Qiaomei Wang<sup>1,2\*</sup>

## Supplementary materials

**Table S1** Primers used in reverse transcription-quantitative polymerase chain reaction (RT-qPCR) analysis.

| Gene Name      | Locus Code | Primes sequence (5'-3') for RT-PCR                     |
|----------------|------------|--------------------------------------------------------|
| <i>MYB34</i>   | At5g60890  | CGGGTCTTAAGTAATTAGCC<br>AAGAAAGGAGCTTGGACTCC           |
| <i>MYB51</i>   | At1g18570  | ACAAATGGTCTGCTATAGCT<br>CTTGTGTGTAAGTGGATCAA           |
| <i>MYB122</i>  | At1g74080  | TCCGTTGAGTCTTGTTTGG<br>TTGTCAATCCCTTCACAGGA            |
| <i>MYB28</i>   | At5g61420  | TCCCTGACAAATACTCTTGCTGAT<br>CATTGTGGTTATCTCCTCCGAATT   |
| <i>MYB29</i>   | At5g07690  | CAATACTGGAGGAGGATATAACC<br>AGTTCTTGTCGCATAATCTTGG      |
| <i>MYB76</i>   | At5g07700  | ACGTTTAATCGATGATGGCA<br>ATGGGCTCAACTGGATTAGG           |
| <i>CYP79F1</i> | At1g16410  | CCATACCCTTTTCACATCCTACTGTCT<br>GTAGATTGCCGAGGATGGGC    |
| <i>CYP79F2</i> | At1g16400  | ACTAGGATTTATCGTCTTCATCGCA<br>CTAGGACGAGTCATGATTAGTTCGG |
| <i>CYP79B2</i> | At4g39950  | TTTGATGGATTGTCTGGCGC<br>CAAAGACGAACAAGGCAACC           |
| <i>CYP79B3</i> | At2g22330  | CGGTTTGTTTATCATCTCCGC<br>TTGCTTACCGCTGATGAAATC         |
| <i>CYP83A1</i> | At4g13770  | TTCAAGAGGTTGTCAATGAGACGC<br>CTACAATATCCAAGATGACGGCTTT  |
| <i>CYP83B1</i> | At4g31500  | TCCGACCTTTTCCCTTATTTTCG<br>TTGAGACGTGCACTGAGACCAG      |
| <i>UGT74B1</i> | At1g24100  | TATCTTGATGATCGGATGGA<br>TACTGACTGAGCCTGCTTAG           |
| <i>UGT74C1</i> | At2g31790  | GGTGGTTCCATCGAAGTTCT<br>TGTTTCCCAACCACTTCAAA           |
| <i>Actin2</i>  | At3g18780  | TAACTCTCCCGCTATGTATGTCCG<br>CCTGAGCACAATGTTACCGTAC     |

**Figure S1** Effect of jasmonic acid (JA) and/or glucose (Glu) on individual indolic and aliphatic glucosinolate (GS) biosynthesis. (A) Individual indolic GS level was measured in 13-d-old *Arabidopsis* seedlings treated with 5  $\mu$ M JA and/or 250 mM Glu for 3 d. (B) Individual aliphatic GS level was measured in 13-d-old *Arabidopsis* seedlings treated with 5  $\mu$ M JA and/or 250 mM Glu for 3 d. Each data is the mean of five replicates per treatment (mean  $\pm$  standard error). Values not sharing a common letter are significantly different at  $p < 0.05$ .

**Figure S2** Effect of salicylic acid (SA) and/or glucose (Glu) on individual indolic and aliphatic glucosinolate (GS) biosynthesis. (A) Individual indolic GS level was measured in 13-d-old *Arabidopsis* seedlings treated with 5  $\mu$ M SA and/or 250 mM Glu for 3 d. (B) Individual aliphatic GS level was measured in 13-d-old *Arabidopsis* seedlings treated with 5  $\mu$ M SA and/or 250 mM Glu for 3 d. Each data is the mean of five replicates per treatment (mean  $\pm$  standard error). Values not sharing a common letter are significantly different at  $p < 0.05$ .

**Figure S3** Role of HXK in the jasmonic-acid- (JA-) and glucose- (Glu-) induction of glucosinolate (GS) in *Arabidopsis*. (A) Indolic GS accumulation in 13-d-old Col-0 (open bars) and *gin2-1* (closed bars) seedlings on a low-Glu MS medium (Control) or MS medium supplemented with 250 mM Glu, 250 mM Sorbitol (Sor), 5  $\mu$ M JA and 250 mM Glu+5  $\mu$ M JA. (B) Aliphatic GS content in 13-d-old Col-0 (open bars) and *gin2-1* (closed bars) seedlings on a low-Glu MS medium (Control) or MS medium supplemented with 250 mM Glu, 250 mM Sor, 5  $\mu$ M JA and 250 mM Glu+5  $\mu$ M JA. Each data is the mean of five replicates per treatment (mean  $\pm$  standard error). Values marked with an asterisk are significantly different at  $p < 0.05$  among the combined treatment of JA together with Glu and other treatments (Control, Glu, Sor and JA). Values not sharing a common letter are significantly different at  $p < 0.05$  with the corresponding wild type under application of JA and Glu together.

**Figure S4** Role of ABI4 in the induction of jasmonic acid (JA) and glucose (Glu) on glucosinolate (GS) accumulation in *Arabidopsis*. (A) Indolic GS accumulation in 13-d-old Col-0 (open bars) and *abi4-1* (closed bars) seedlings on a low-Glu MS medium (Control) or MS medium supplemented with 250 mM Glu, 250 mM Sorbitol (Sor), 5  $\mu$ M JA and 250 mM Glu+5  $\mu$ M JA. (B) Aliphatic GS accumulation in 13-d-old Col-0 (open bars) and *abi4-1* (closed bars) seedlings on a low-Glu MS medium (Control) or MS medium supplemented with 250 mM Glu, 250 mM Sor, 5  $\mu$ M JA and 250 mM Glu+5  $\mu$ M JA. Values marked with an asterisk are significantly different at  $p < 0.05$  among the combined treatment of JA together with Glu and other treatments (Control, Glu, Sor and JA). Values not sharing a common letter are significantly different at  $p < 0.05$  with the corresponding wild type under application of JA and Glu together.

Figure S1

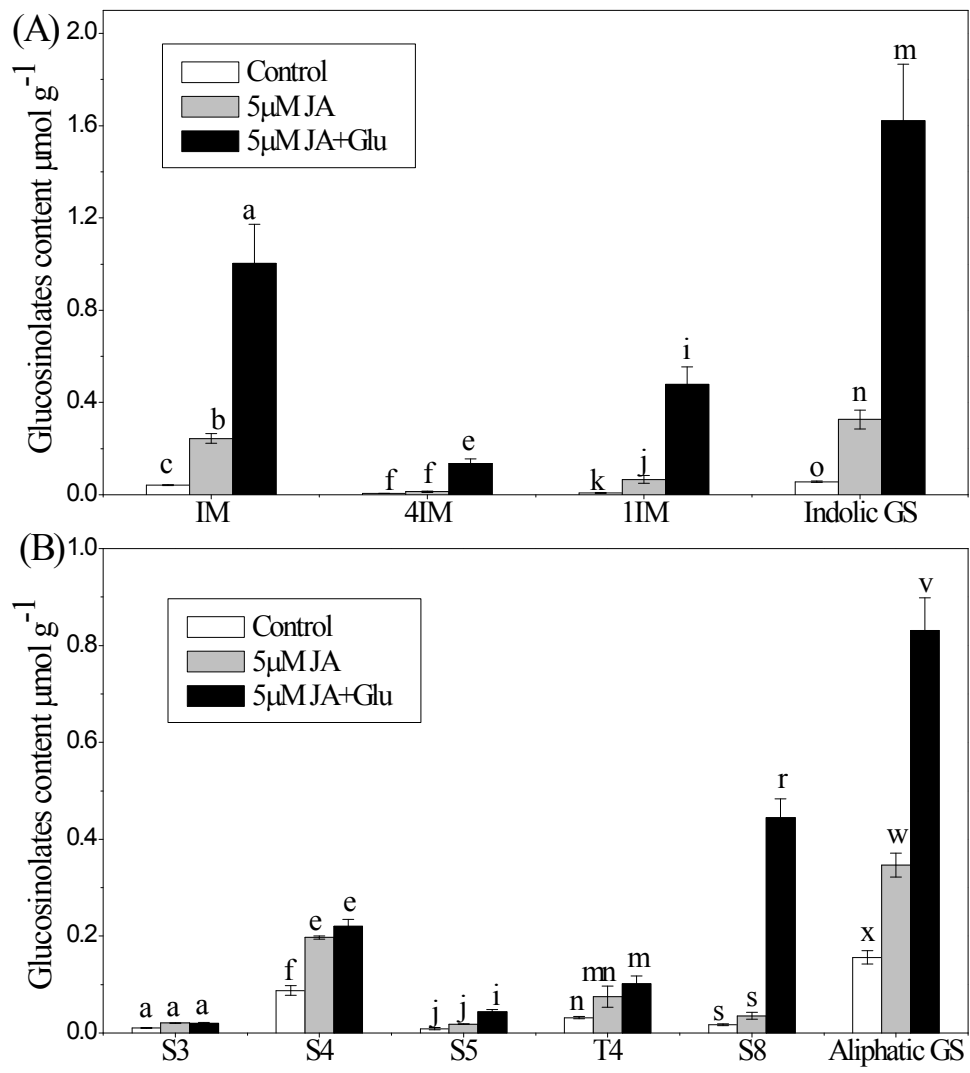

Figure S2

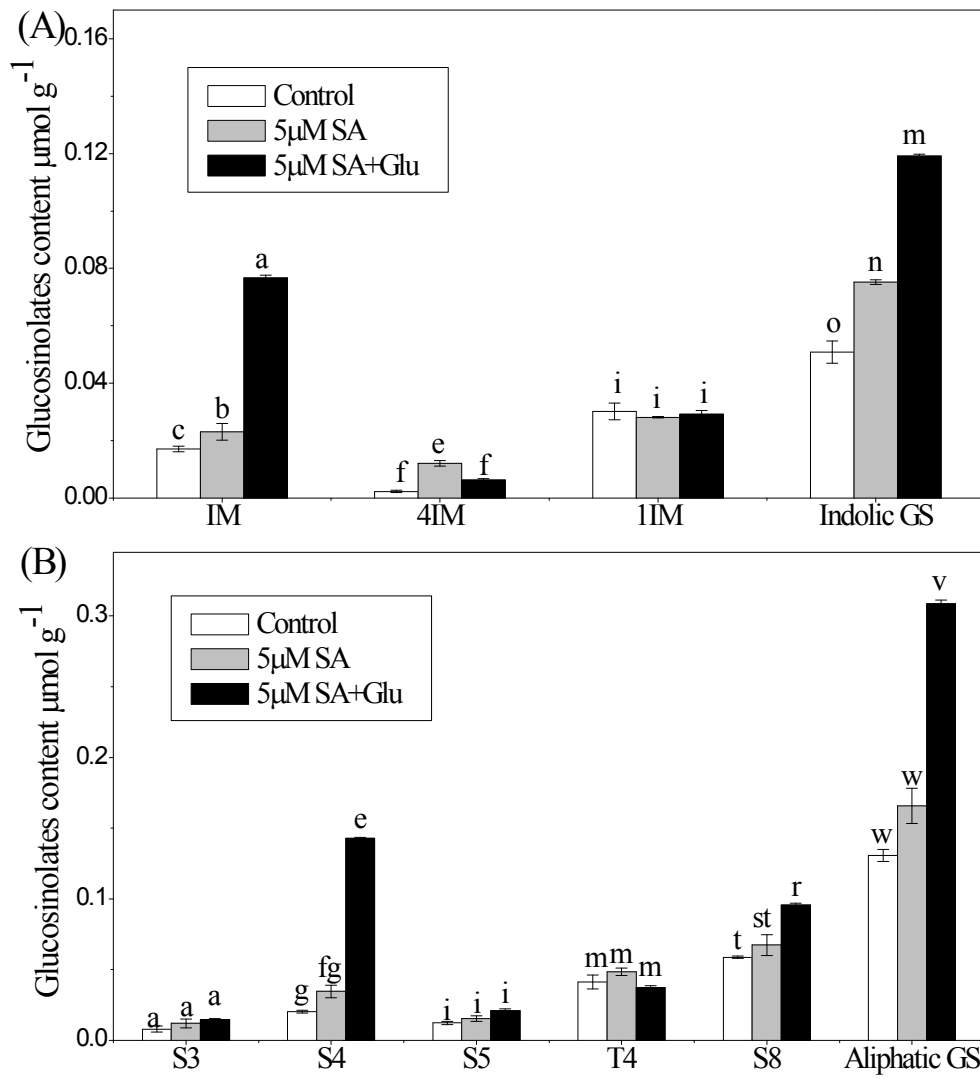

Figure S3

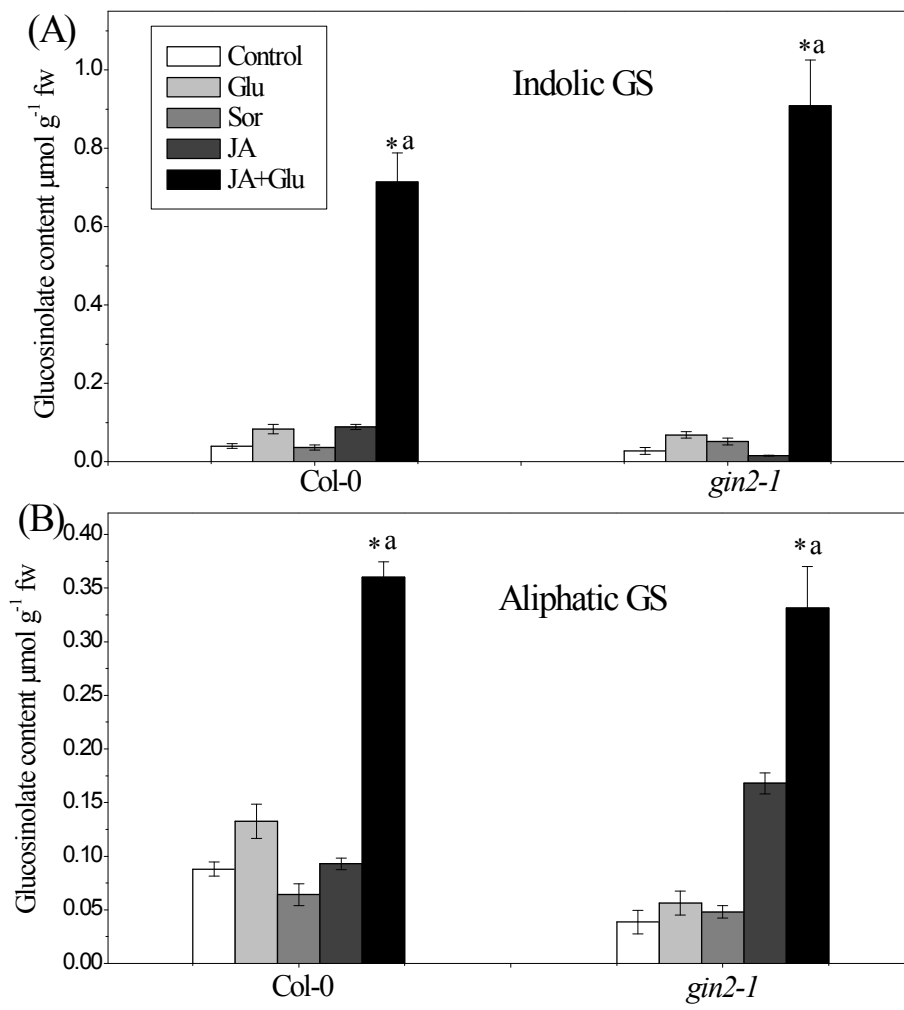

Figure S4

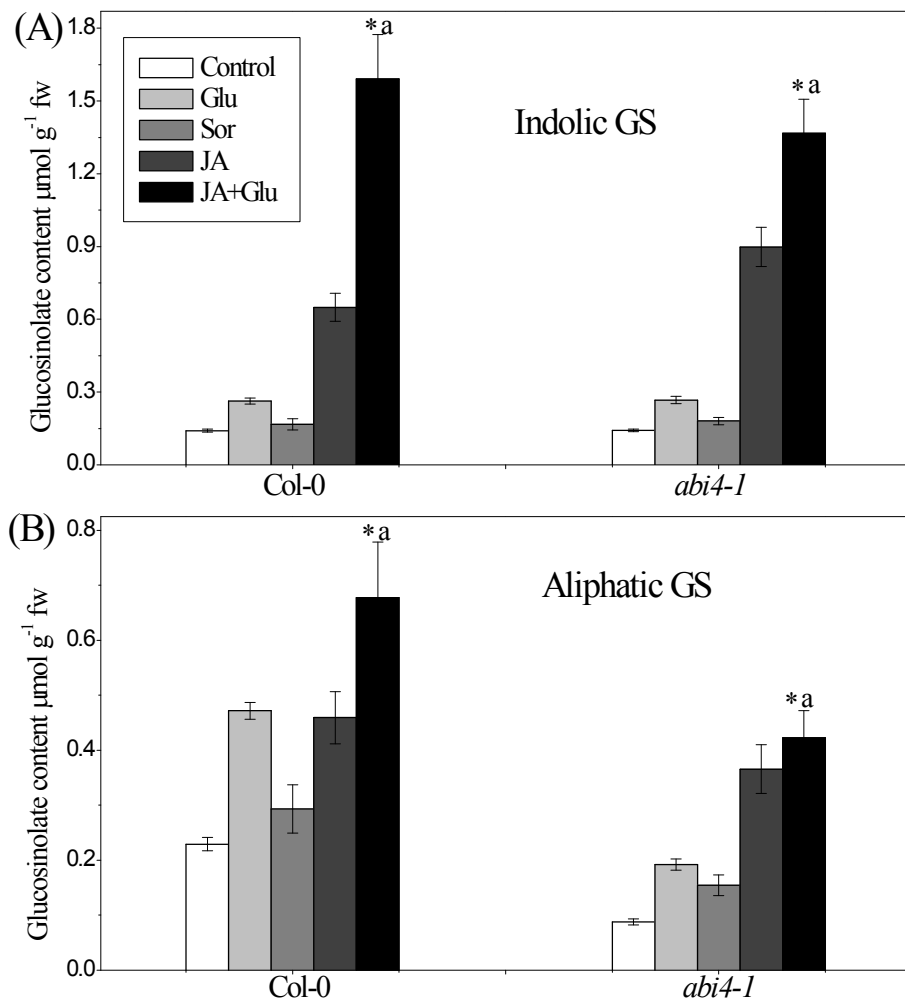

Supplement: supp_ert348_jexbot098103_file001.pdf [file supp_ert348_jexbot098103_file001.pdf]
